# Supplementary material for: Randomised Controlled Trial: Partial Hydrolysation of Casein Protein in Milk Decreases Gastrointestinal Symptoms in Subjects with Functional Gastrointestinal Disorders
Source: Nutrients. 2020 Jul 18;12(7):2140. doi: 10.3390/nu12072140 (PMC7400865; doi:10.3390/nu12072140)
Supplement: Supplementary file 1 [file nutrients-12-02140-s001.pdf]

**Supplementary materials**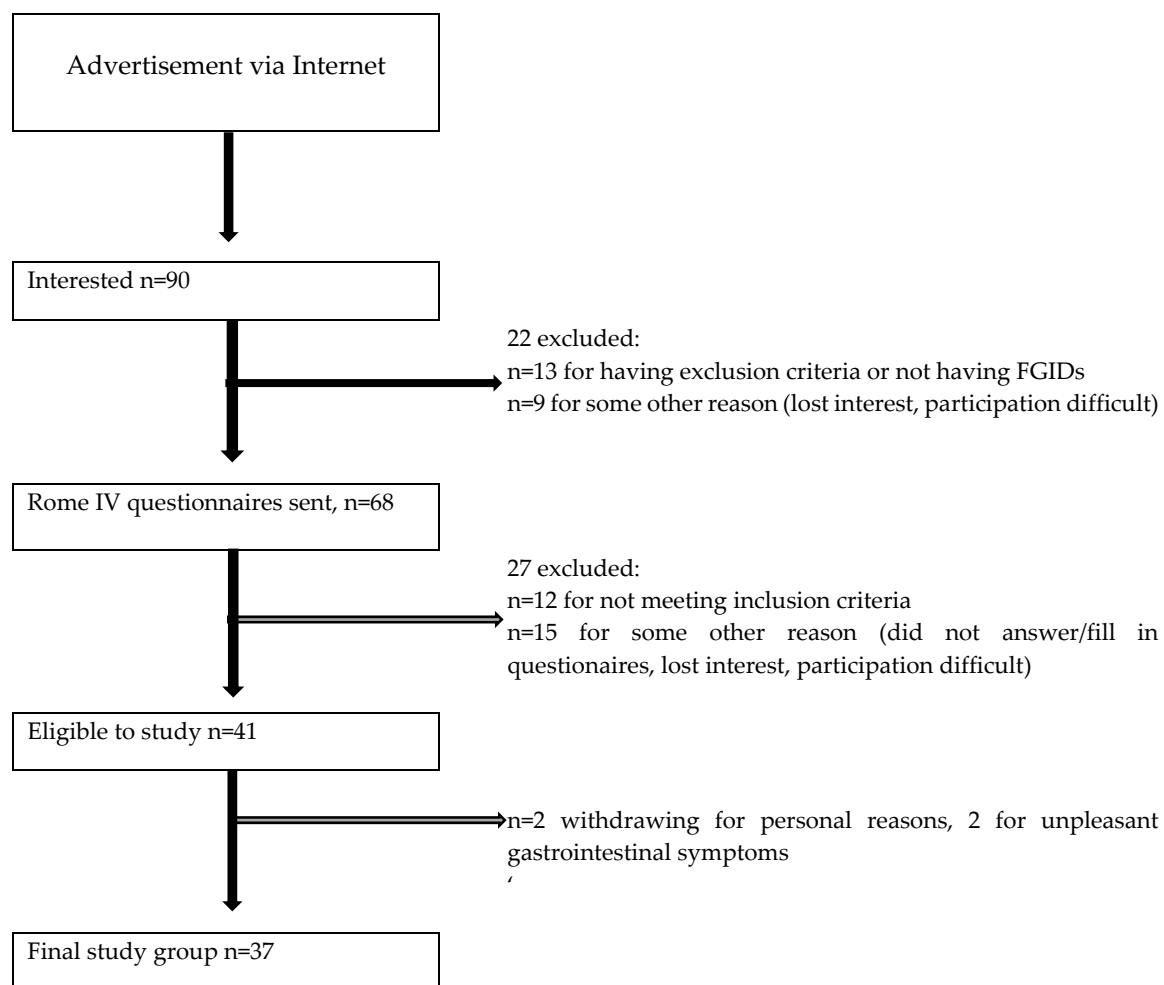**Figure S1.** Flow chart.

Please rate the discomfort caused by the following gastrointestinal symptoms today on a scale from 1 to 5

(1=no discomfort, 5=severe discomfort)

|                           | 1   | 2   | 3   | 4   | 5   |
|---------------------------|-----|-----|-----|-----|-----|
| Abdominal pain            | ( ) | ( ) | ( ) | ( ) | ( ) |
| Bloating                  | ( ) | ( ) | ( ) | ( ) | ( ) |
| Flatulence                | ( ) | ( ) | ( ) | ( ) | ( ) |
| Rumbling                  | ( ) | ( ) | ( ) | ( ) | ( ) |
| Diarrhea                  | ( ) | ( ) | ( ) | ( ) | ( ) |
| Constipation              | ( ) | ( ) | ( ) | ( ) | ( ) |
| Heartburn                 | ( ) | ( ) | ( ) | ( ) | ( ) |
| Rapid feeling of fullness | ( ) | ( ) | ( ) | ( ) | ( ) |

Figure S2. Symptom diary.

Figure S3 (a-i).

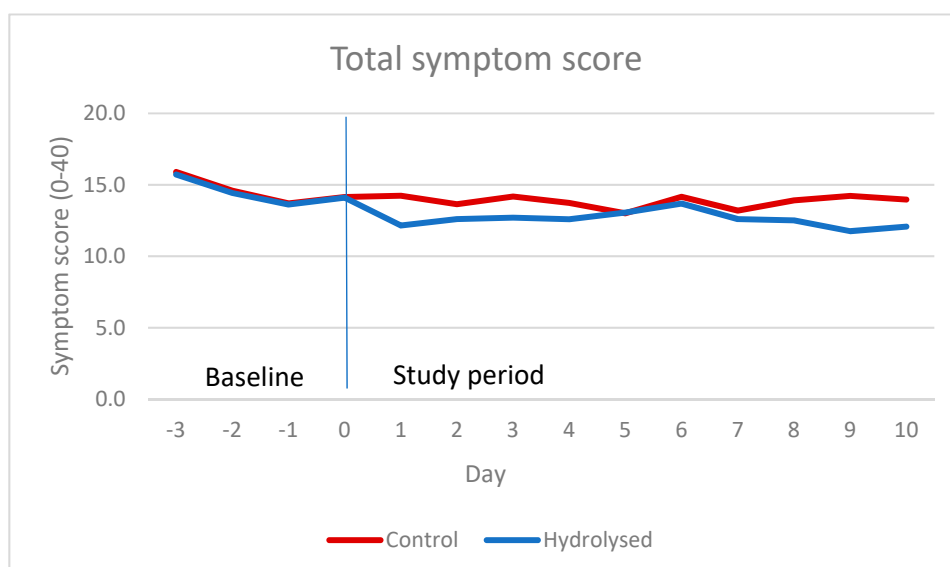

Figure S3.a. The development of total symptom score for gastrointestinal symptoms during the ten-day study periods

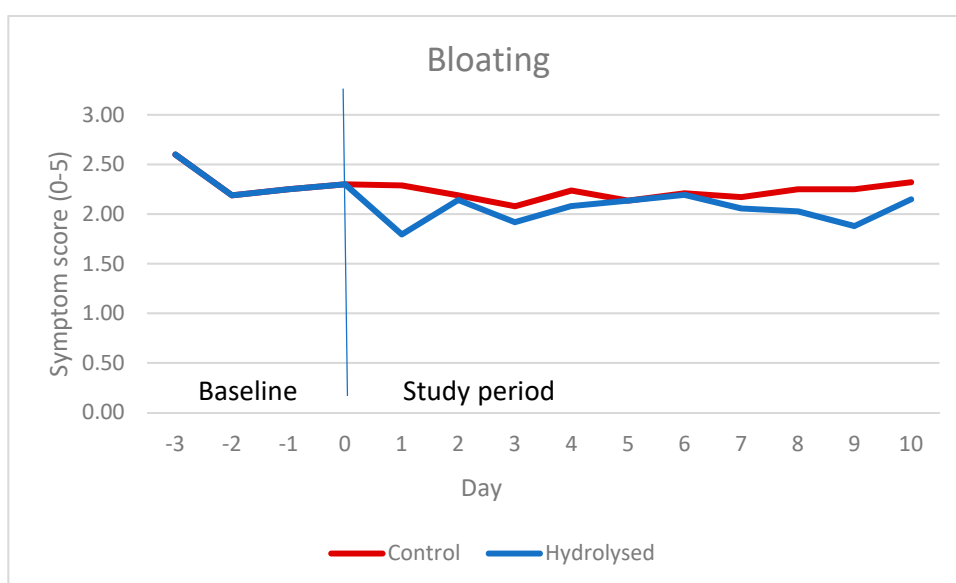

Figure S3.b. The development of bloating during the ten-day study periods

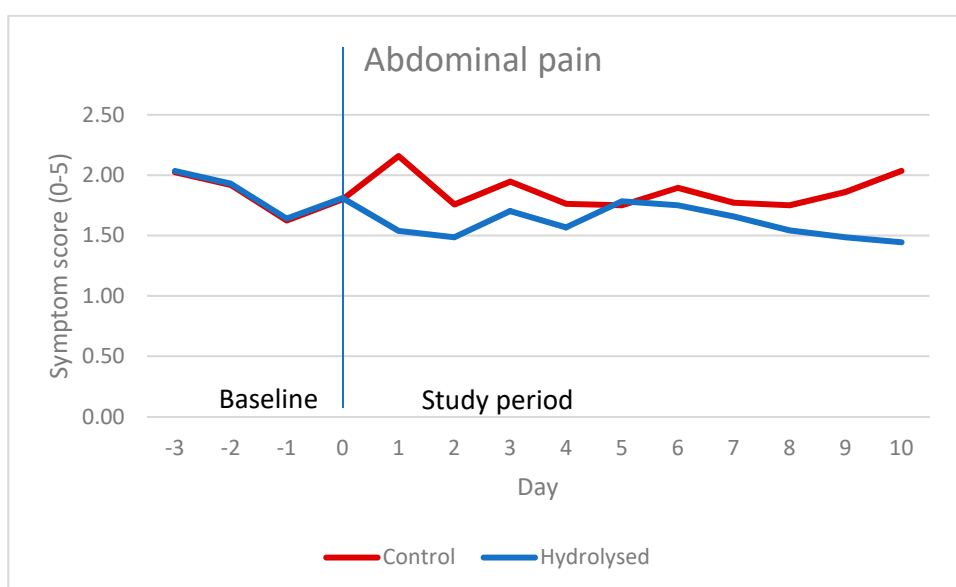

Figure S3.c. The development of abdominal pain during the ten-day study periods

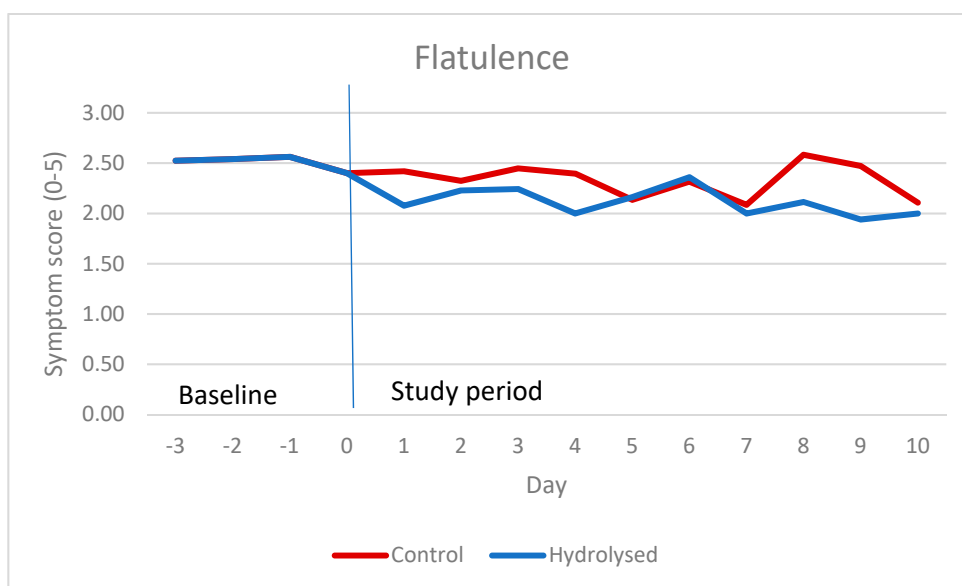

Figure S4.d. The development of flatulence during the ten-day study periods

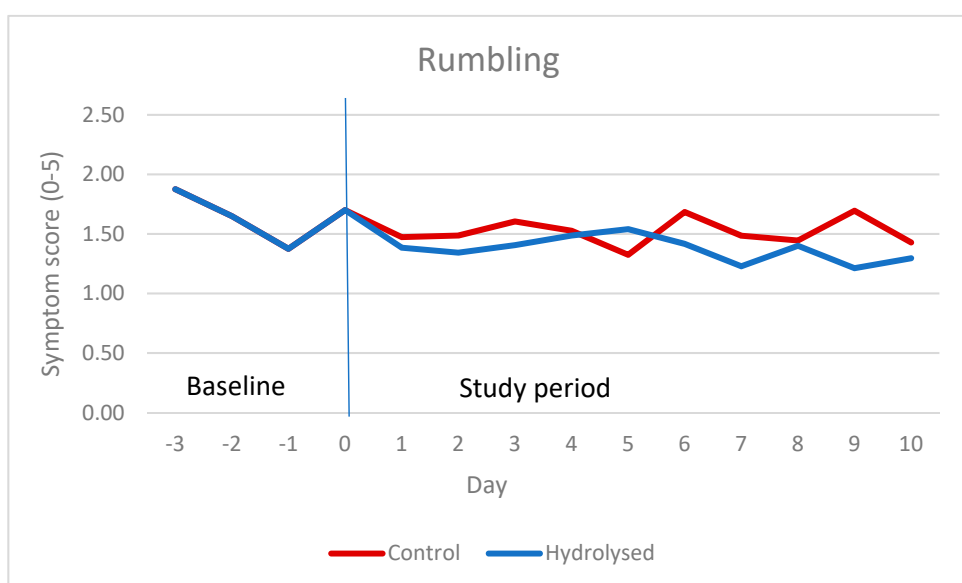

Figure S3.e. The development of rumbling during the ten-day study periods

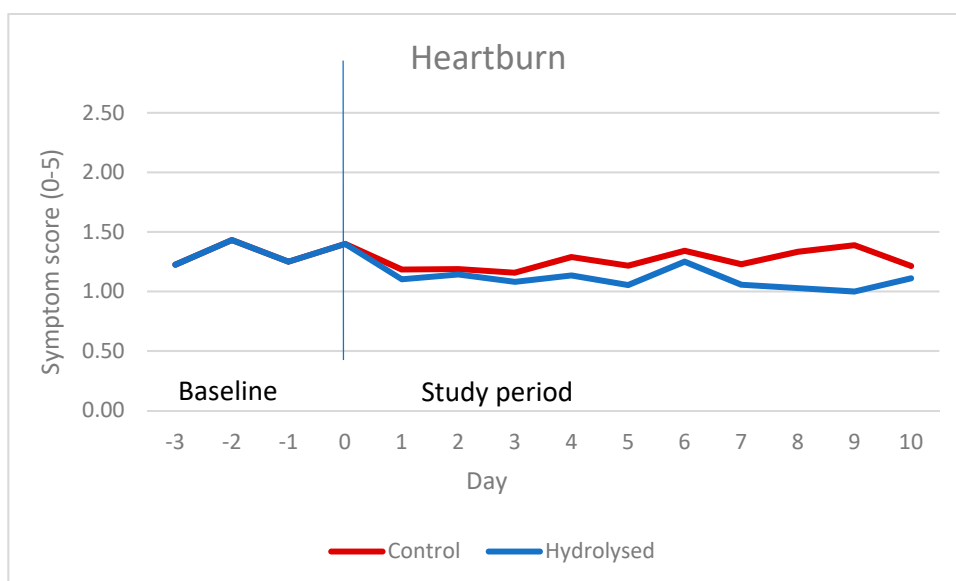

Figure S3.f. The development of heartburn during the ten-day study periods

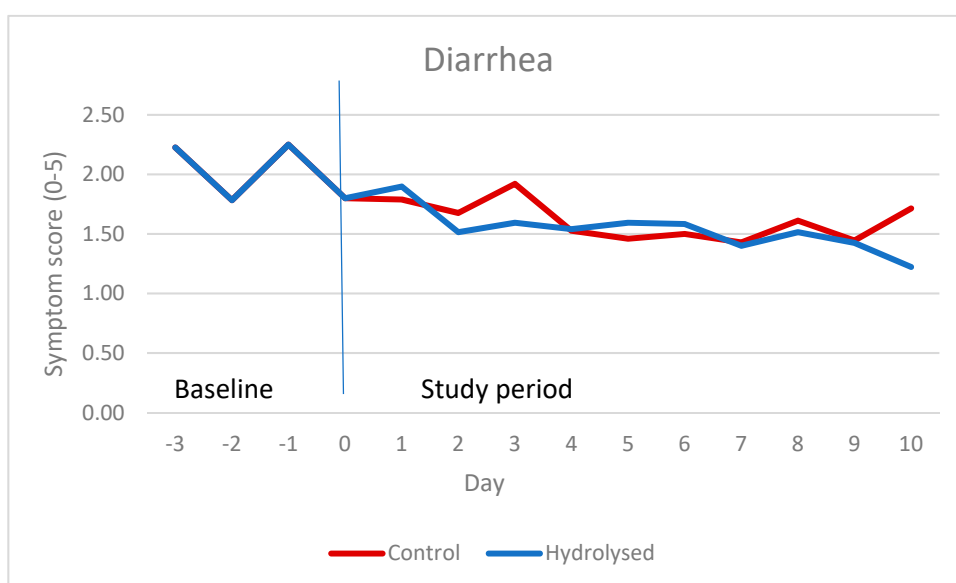

Figure S3.g. The development of diarrhea during the ten-day study periods

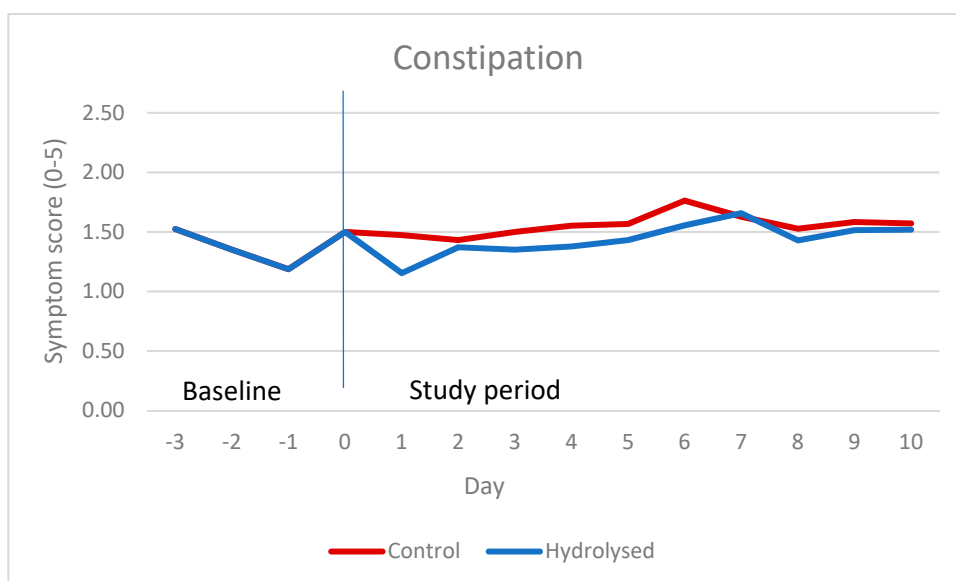

Figure S3.h. The development of constipation during the ten-day study periods

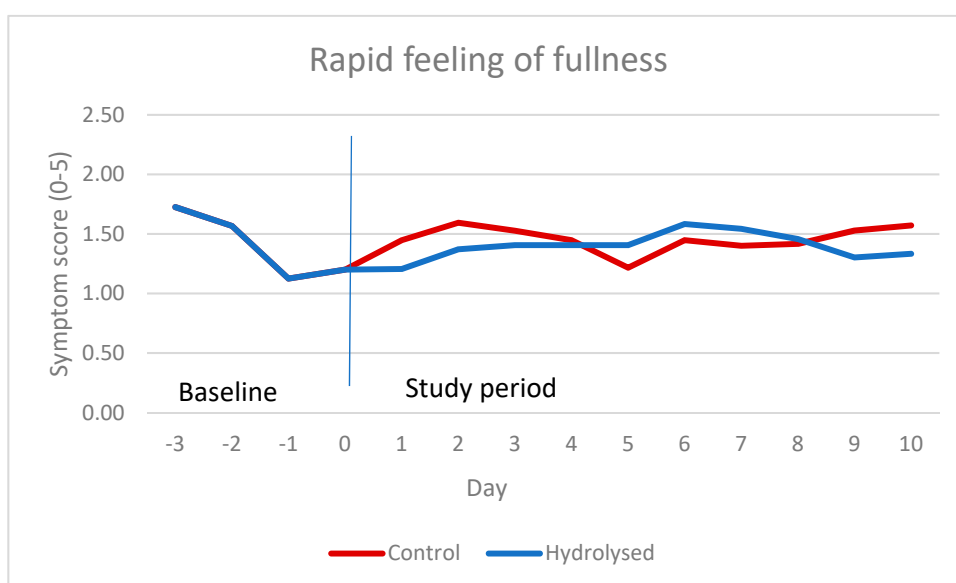

Figure S3.i. The development of a rapid feeling of fullness during the ten-day study periods
